# Supplementary material for: “Click-to-Clear”: A Strategy to Minimize Radioactivity from the Blood Pool Utilizing Staudinger Ligation
Source: MDPI journal article supplement (doi:10.3390/pharmaceutics15030719), 2023-02-21
Supplement: s1 [file s1]

## Supporting Information

### Contents:

Figures S1–S3. Characterization of DPTA (**4**) tracer

Figure S4. Synthesis of N-glycosyl azides

Figures S5–22. Characterization of N-glycosyl azides

Figure S23. Cell Viability of N-glycosyl azides in NIH3T6.7 cells

Figure S24. Cell Viability of N-glycosyl azides in HEK293 cells

Figure S25. Radio thin-layer chromatograms of radiotracer and bioconjugates

Figure S26. Dose optimization study by injecting different amount of N-glycosyl azides

Figures S27–30: Synthesis of 4-(2-hydroxyethyl)-2-iodophenol and spectroscopic characterization

Figure S31: Radiolabeling of 4-(2-hydroxyethyl)-2-[<sup>131</sup>I]iodophenol and HPLC analyses

Figure S32: Radio-TLC analysis of in vivo Staudinger ligation in mice

Figure S33: Biodistribution of 4-(2-hydroxyethyl)-2-[<sup>131</sup>I]iodophenol in normal ICR mice

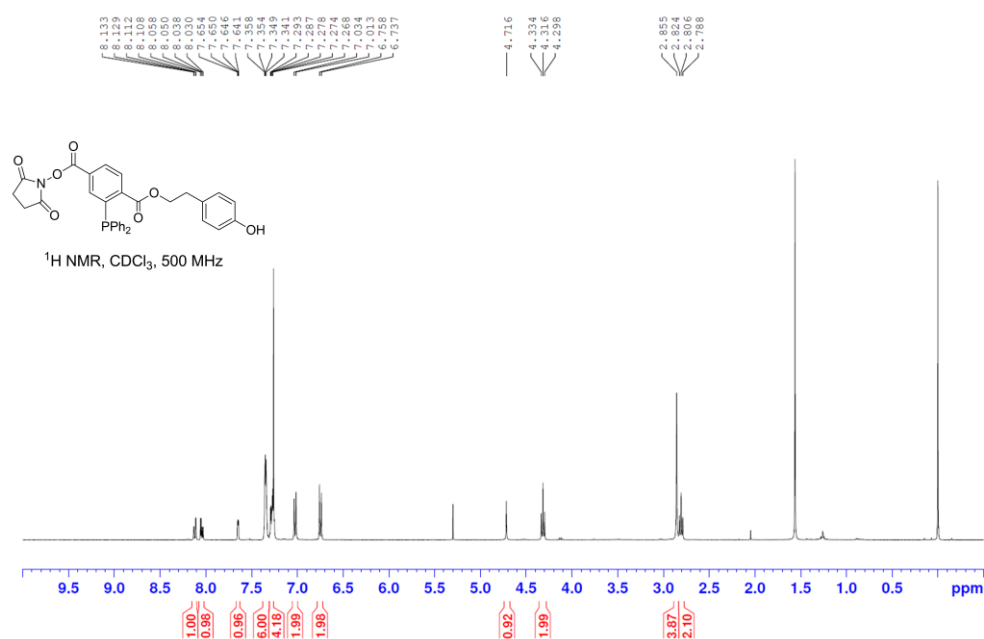

**Figure S1.** <sup>1</sup>H-NMR spectra for tracer DPTA (**4**).

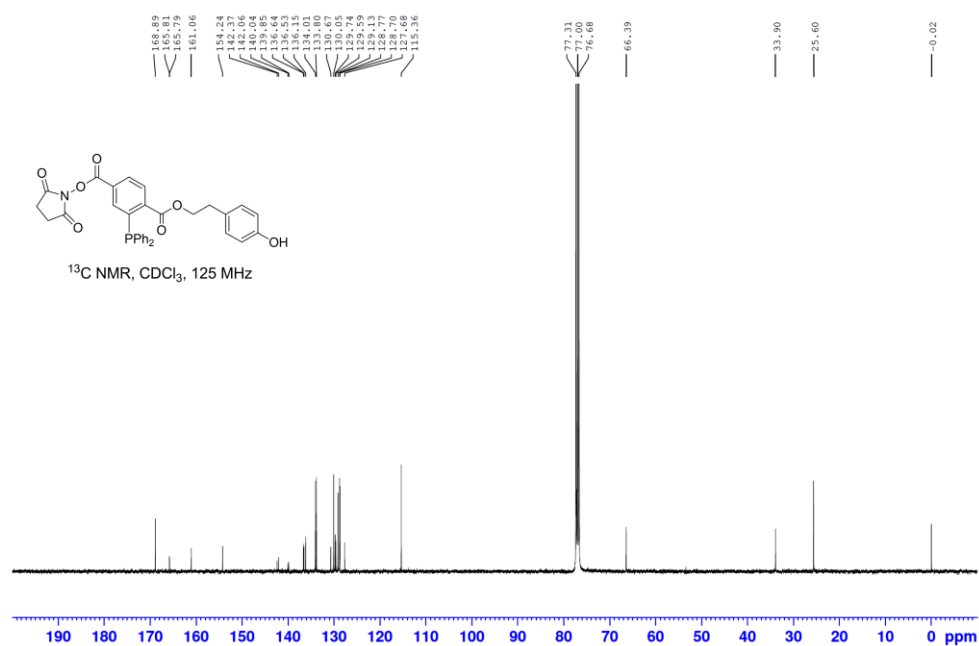

**Figure S2.** <sup>13</sup>C-NMR spectra for tracer DPTA (4).

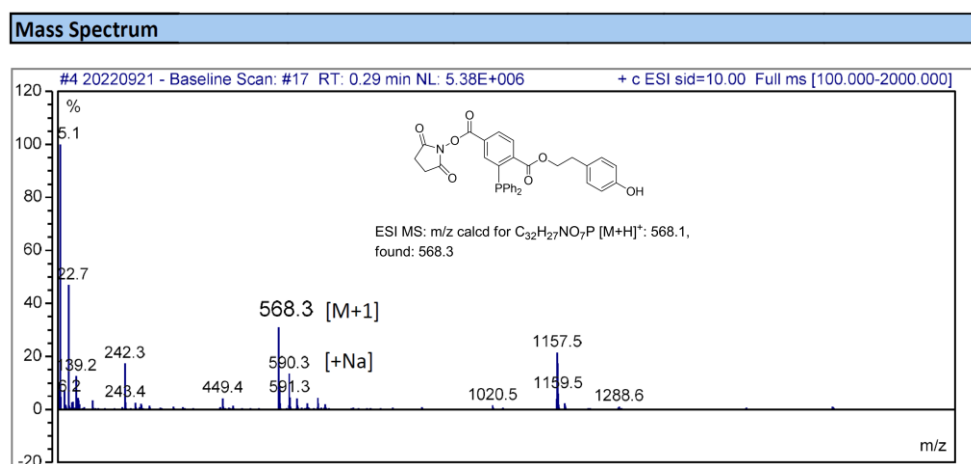

**Figure S3.** ESI-mass spectrometric data for tracer DPTA (4).

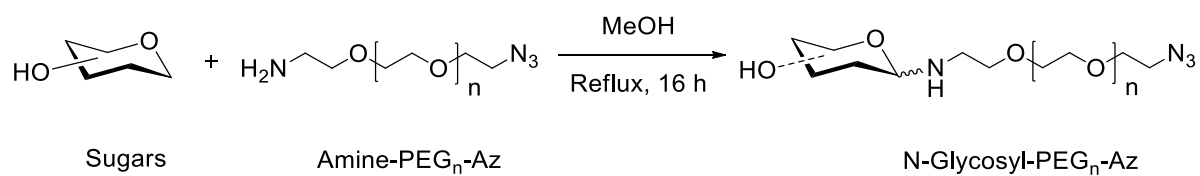

**Figure S4.** Schematic representation for the synthesis of N-glycosyl azides.

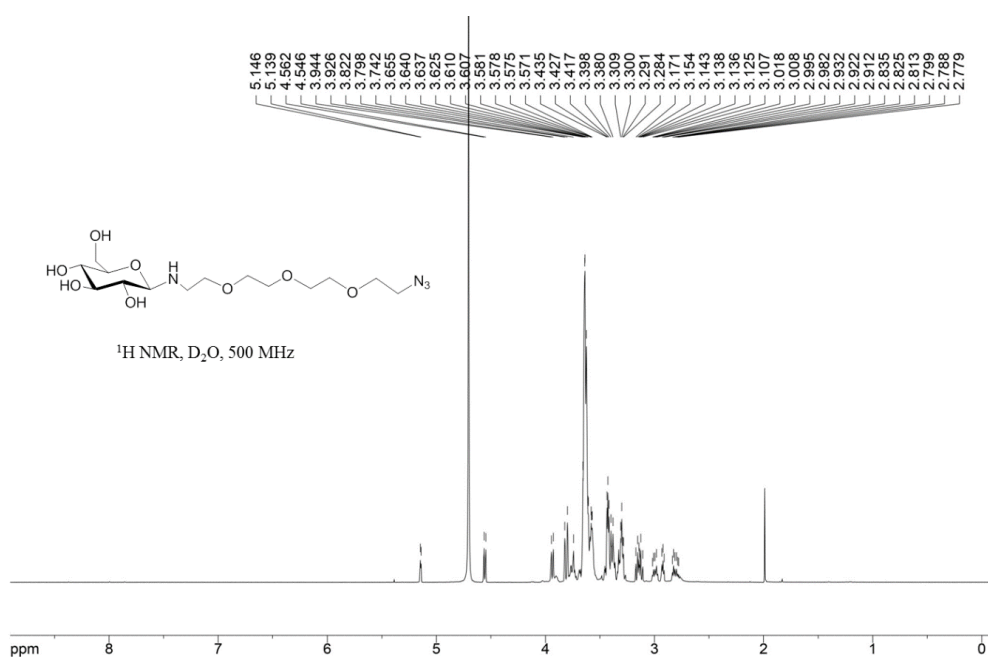

**Figure S5.** <sup>1</sup>H-NMR spectra for glucose-PEG<sub>3</sub>-azide.

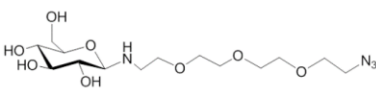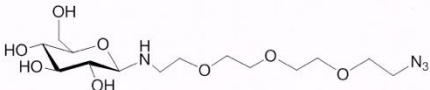

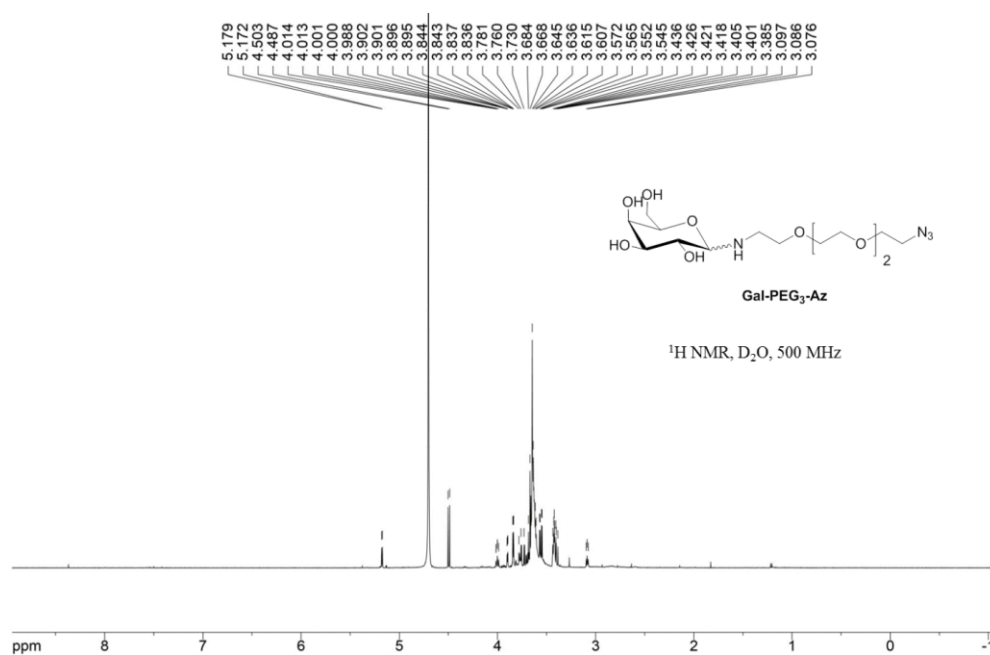

Figure S8. <sup>1</sup>H-NMR spectra for galactose-PEG<sub>3</sub>-azide.

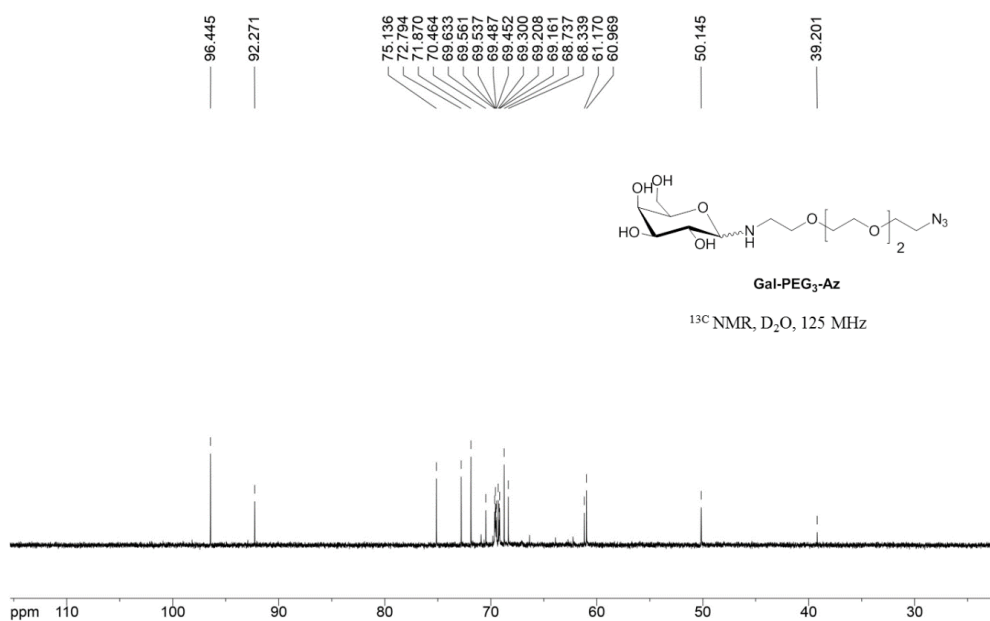

Figure S9. <sup>13</sup>C-NMR spectra for galactose-PEG<sub>3</sub>-azide.

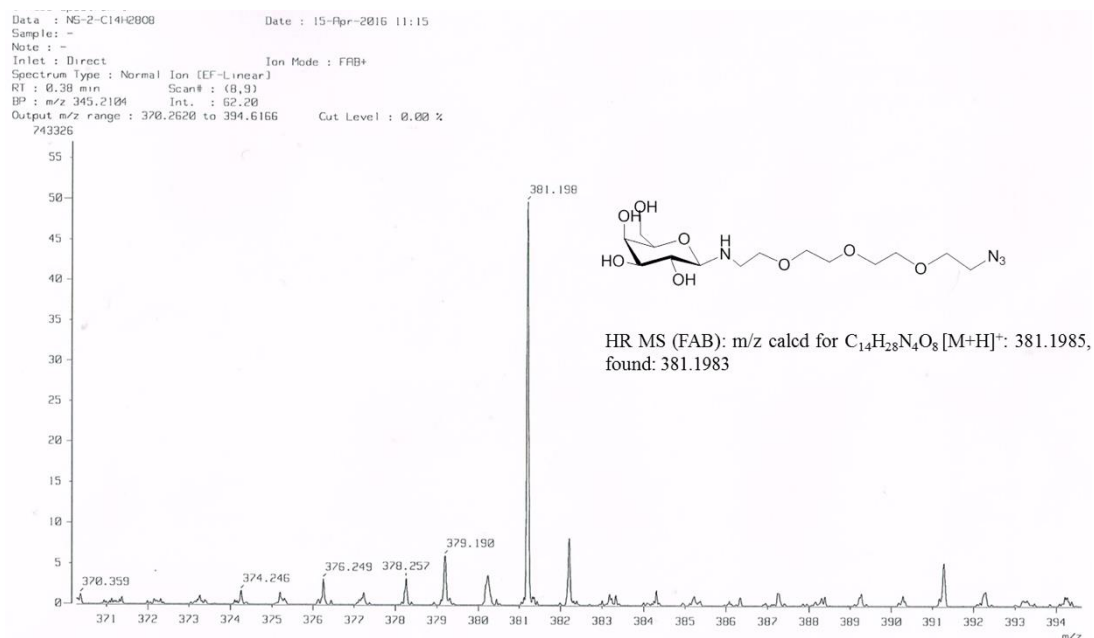

Figure S10. High resolution mass spectroscopic data for galactose-PEG<sub>3</sub>-azide.

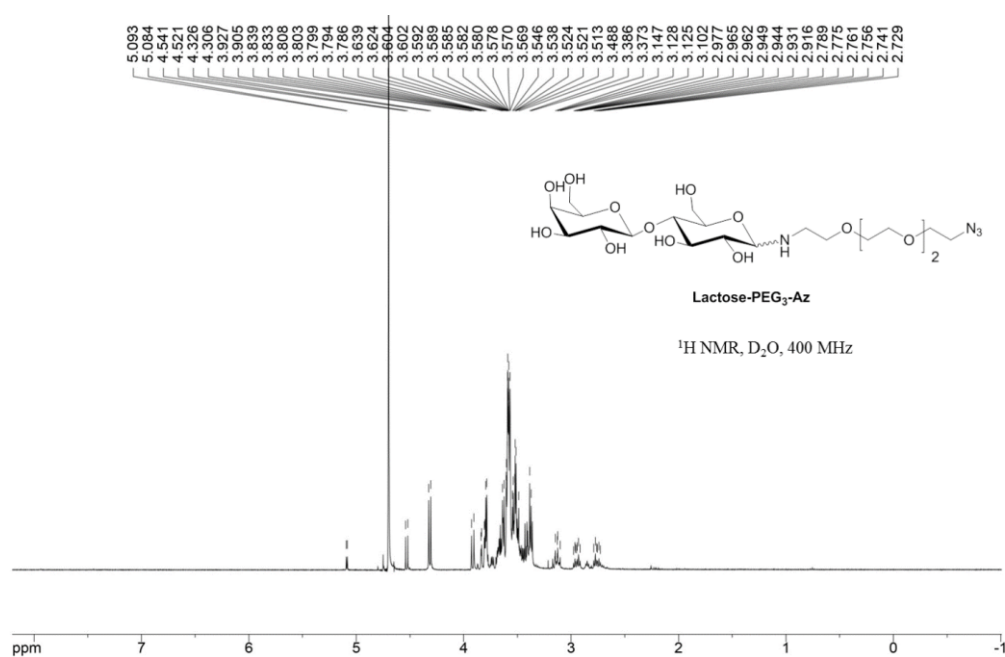

Figure S11.  $^1\text{H}$ -NMR spectra for lactose-PEG<sub>3</sub>-azide.

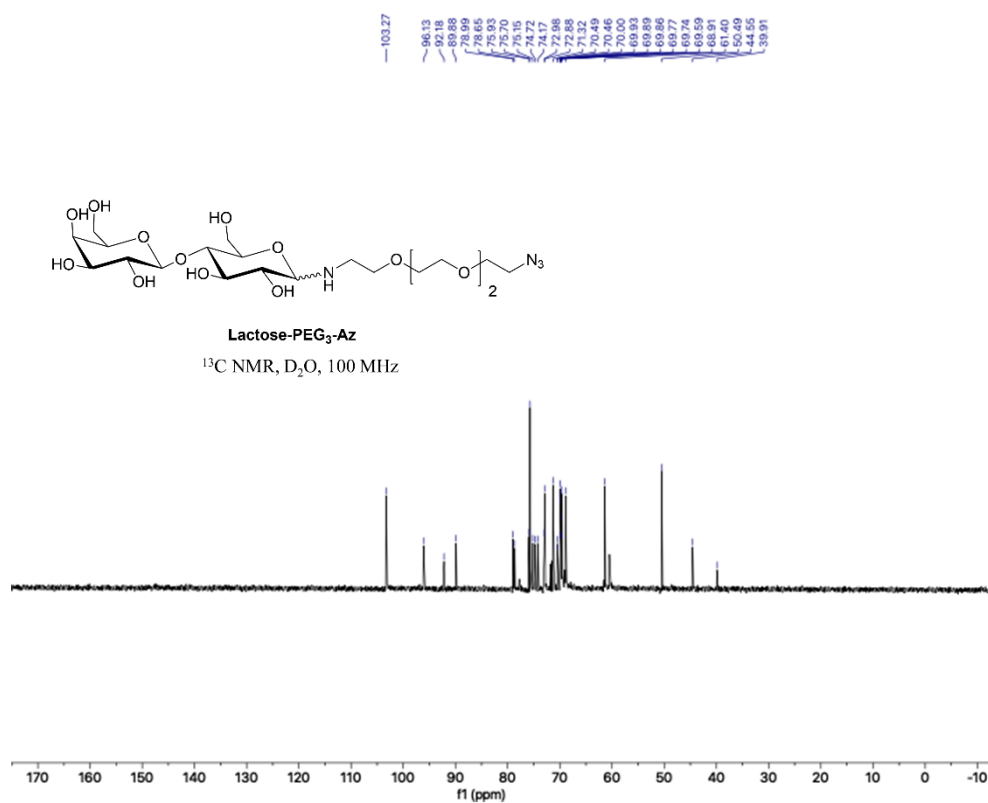

**Figure S12.** <sup>13</sup>C-NMR spectra for lactose-PEG<sub>3</sub>-azide.

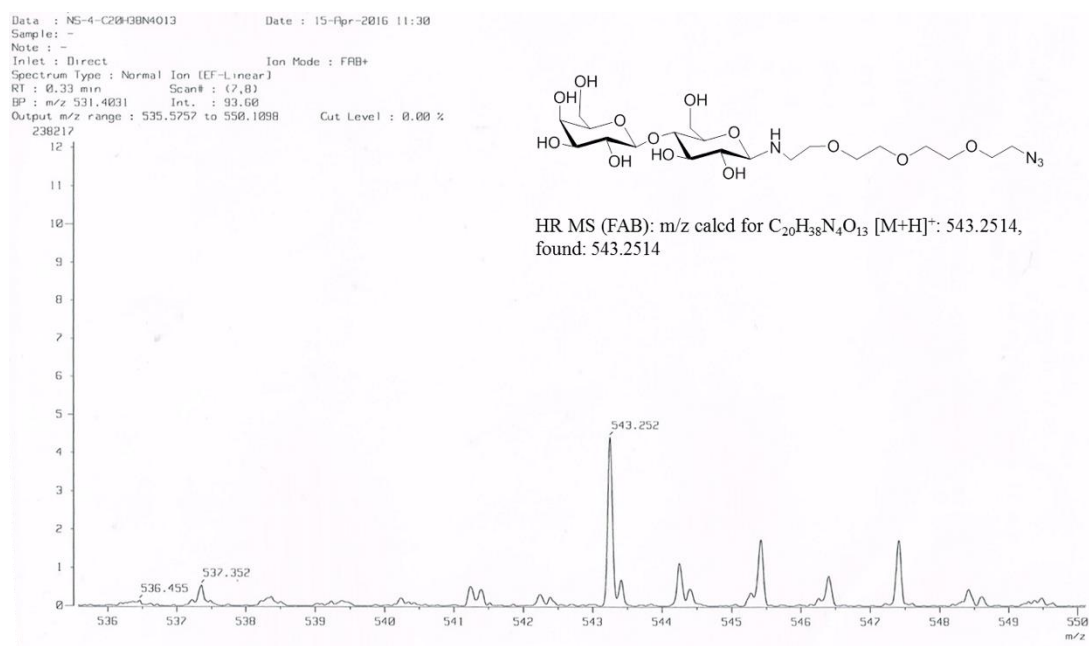

**Figure S13.** High resolution mass spectroscopic data for lactose-PEG<sub>3</sub>-azide.



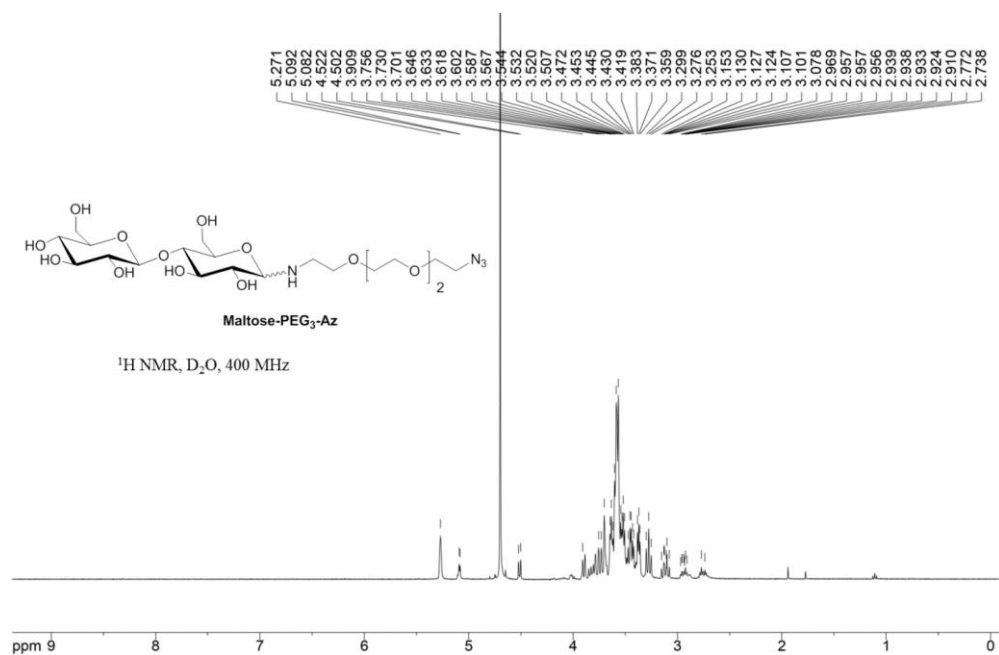

**Figure S14.** <sup>1</sup>H-NMR spectra for maltose-PEG<sub>3</sub>-azide.

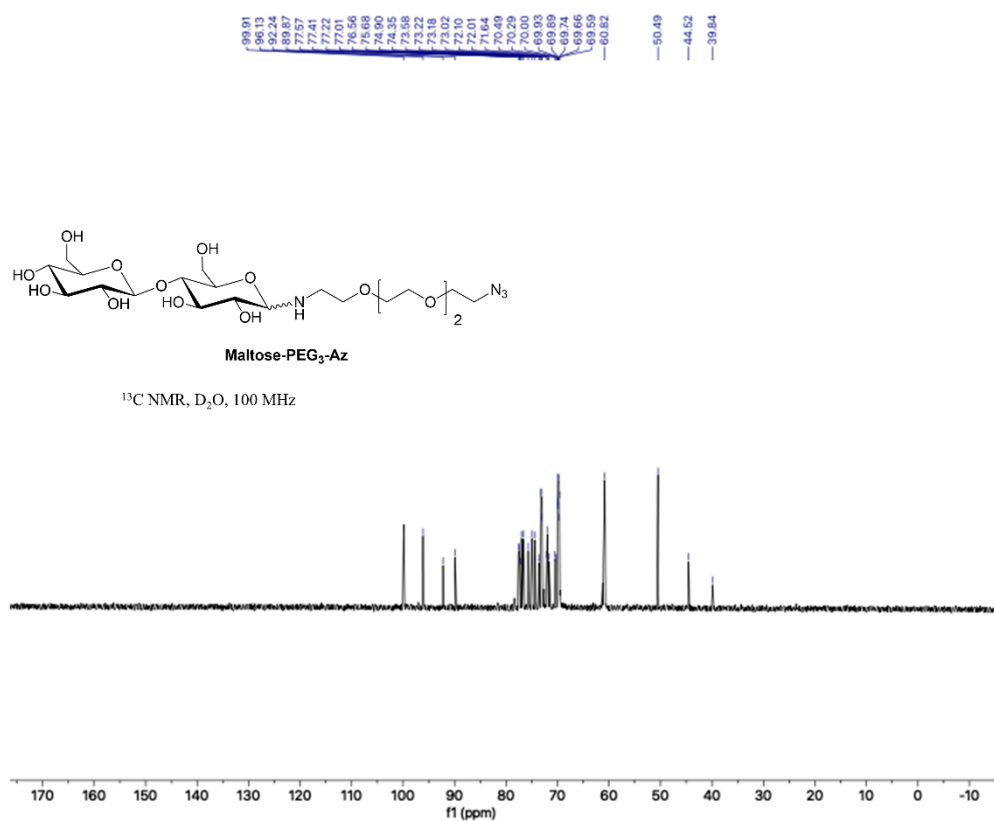

**Figure S15.** <sup>13</sup>C-NMR spectra for maltose-PEG<sub>3</sub>-azide.

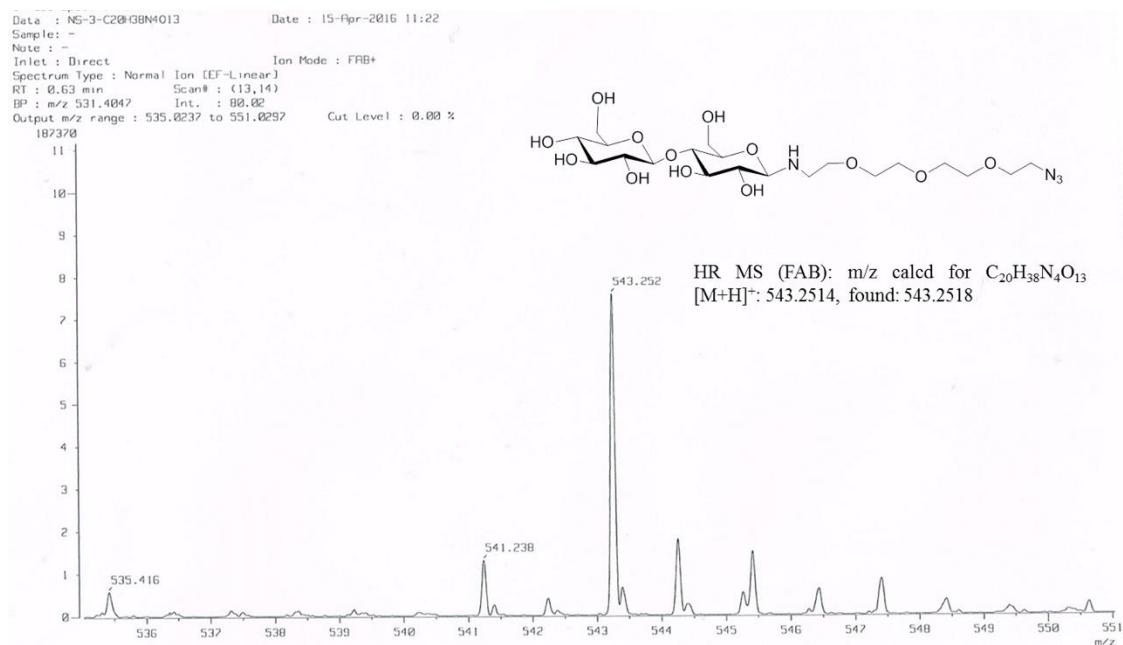

Figure S16. High resolution mass spectroscopic data for maltose-PEG<sub>3</sub>-azide.

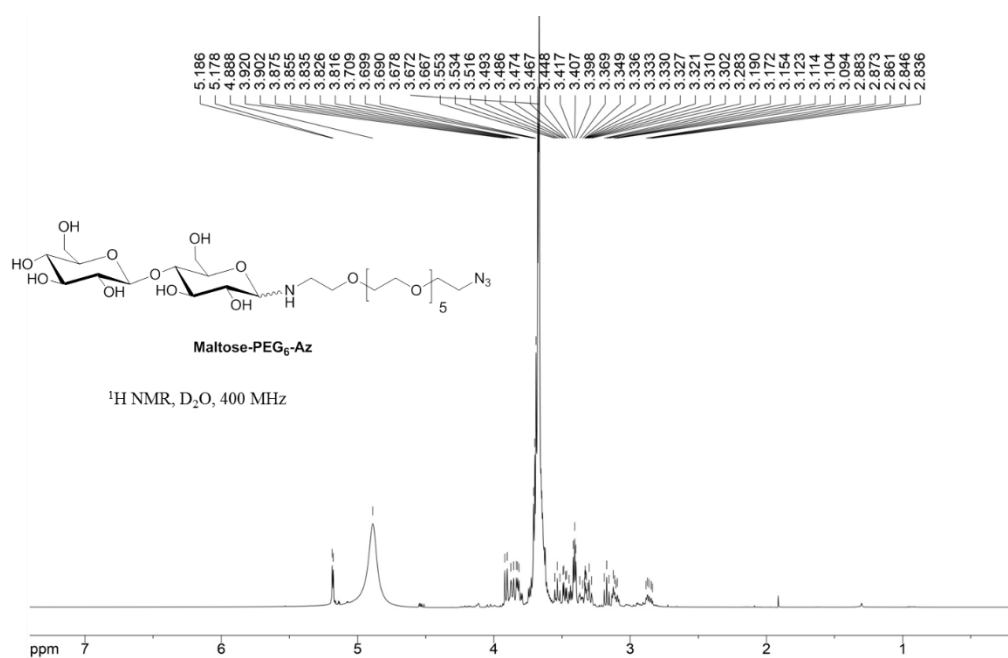

Figure S17.  $^1H$  NMR spectra for maltose-PEG<sub>6</sub>-azide.

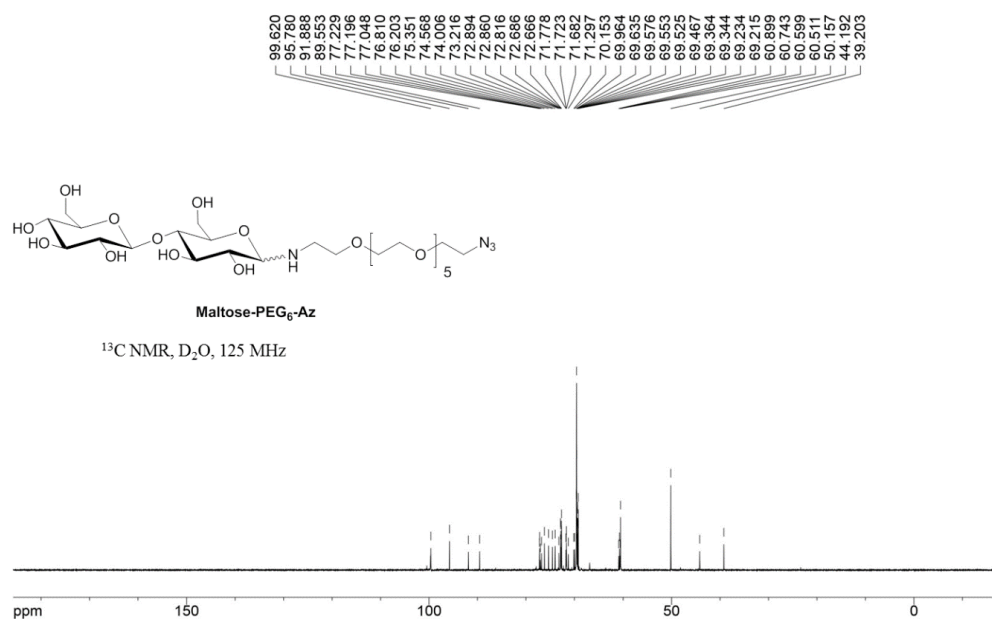

Figure S18. <sup>13</sup>C NMR spectra for maltose-PEG<sub>6</sub>-azide.

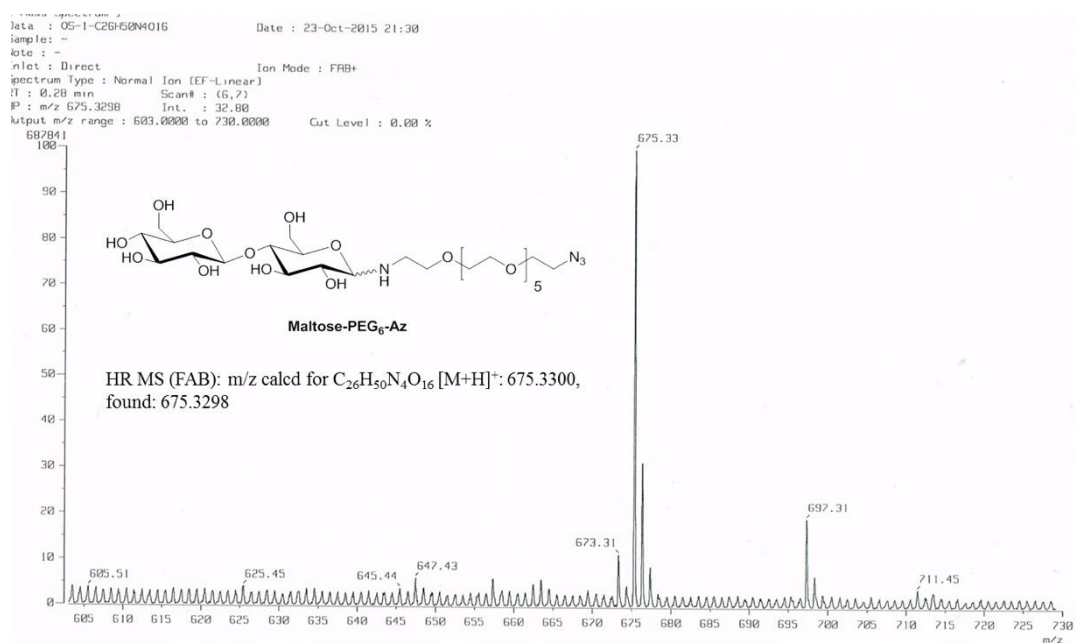

Figure S19. High resolution mass spectroscopic data for maltose-PEG<sub>6</sub>-azide.

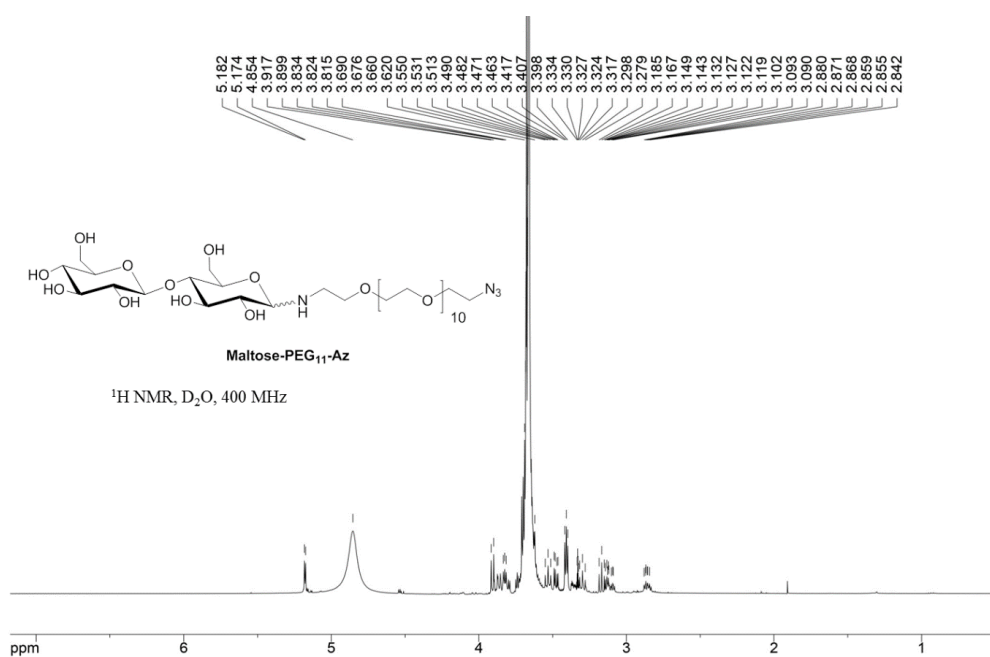

Figure S20. <sup>1</sup>H NMR spectra for maltose-PEG<sub>11</sub>-azide.

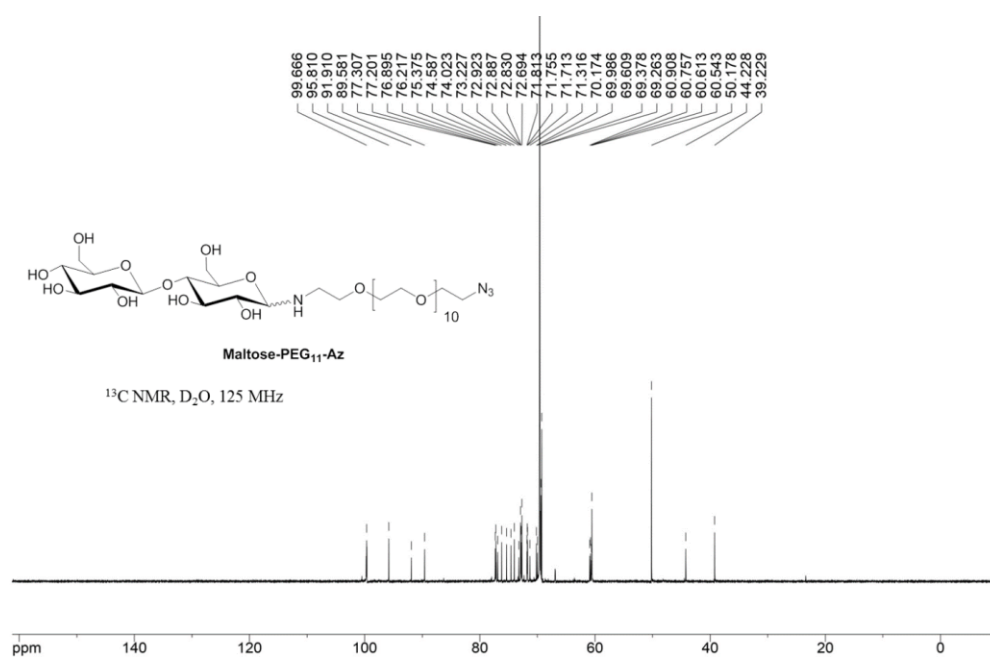

Figure S21. <sup>13</sup>C NMR spectra for maltose-PEG<sub>11</sub>-azide.

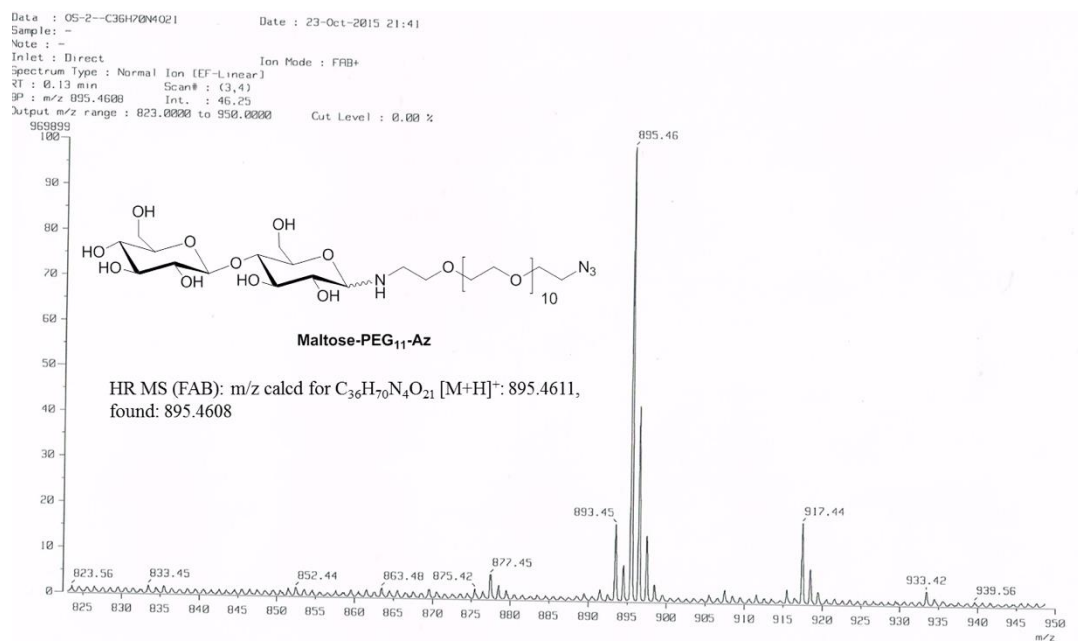

**Figure S22.** High resolution mass spectroscopic data for maltose-PEG<sub>11</sub>-azide.

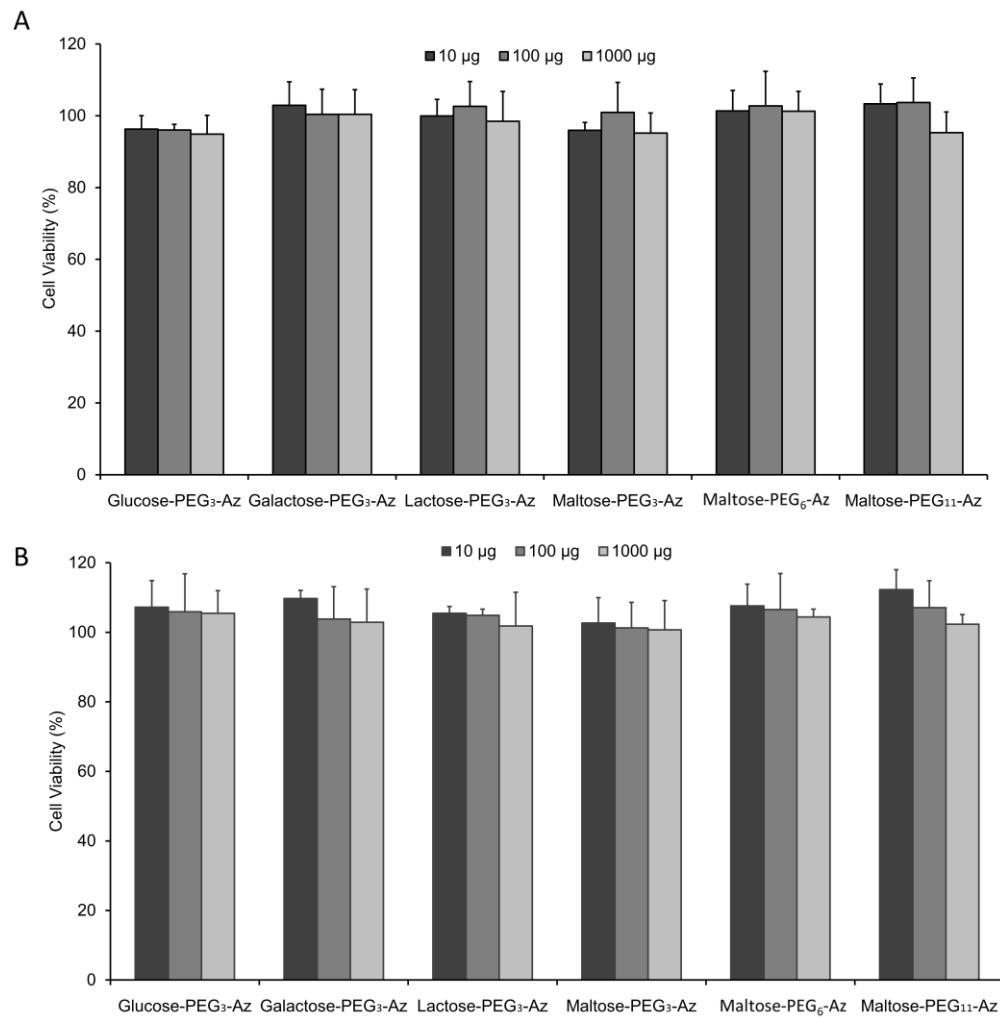

**Figure S23.** Cell viability of N-glycosyl azides performed in NIH3T6.7 cells by MTT assay; 7 h of treatment (**A**) and 24 h of treatment (**B**).

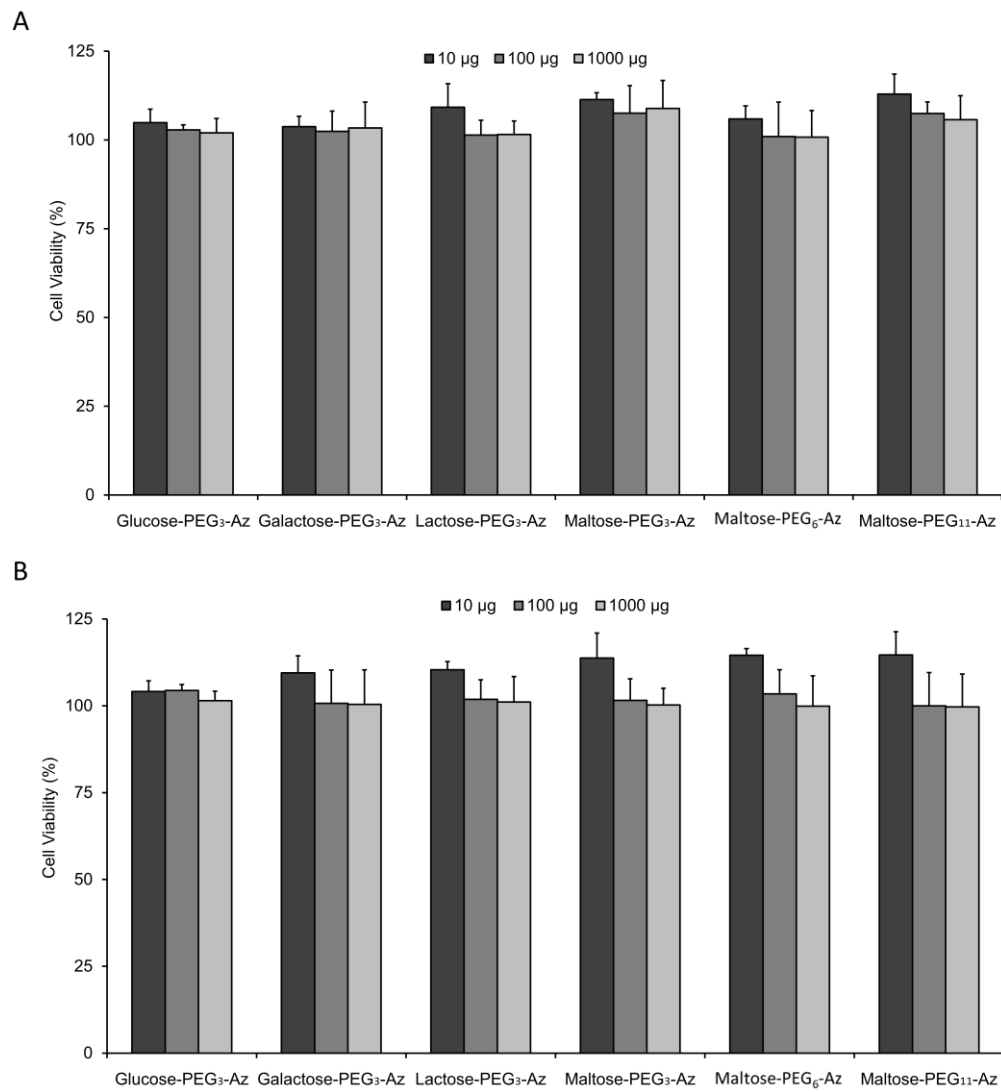

**Figure S24.** Cell viability of N-glycosyl azides performed in HEK293 cells by MTT assay; 7 h of treatment (A) and 24 h of treatment (B).

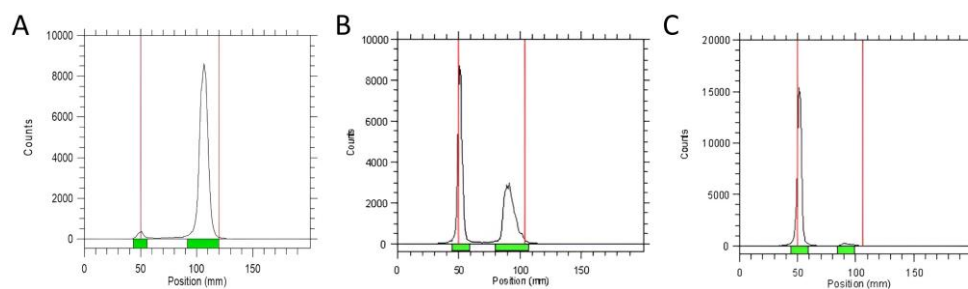

**Figure S25.** Representative radio thin-layer chromatograms of the radioiodinated tracer DPTA (5) (A), bioconjugation of radiotracer DPTA with trastuzumab (B), and the purified  $[^{131}\text{I}]$ DPTA-trastuzumab (6) (C). Radio-TLC analyses were performed on silica with methanol as mobile phase.



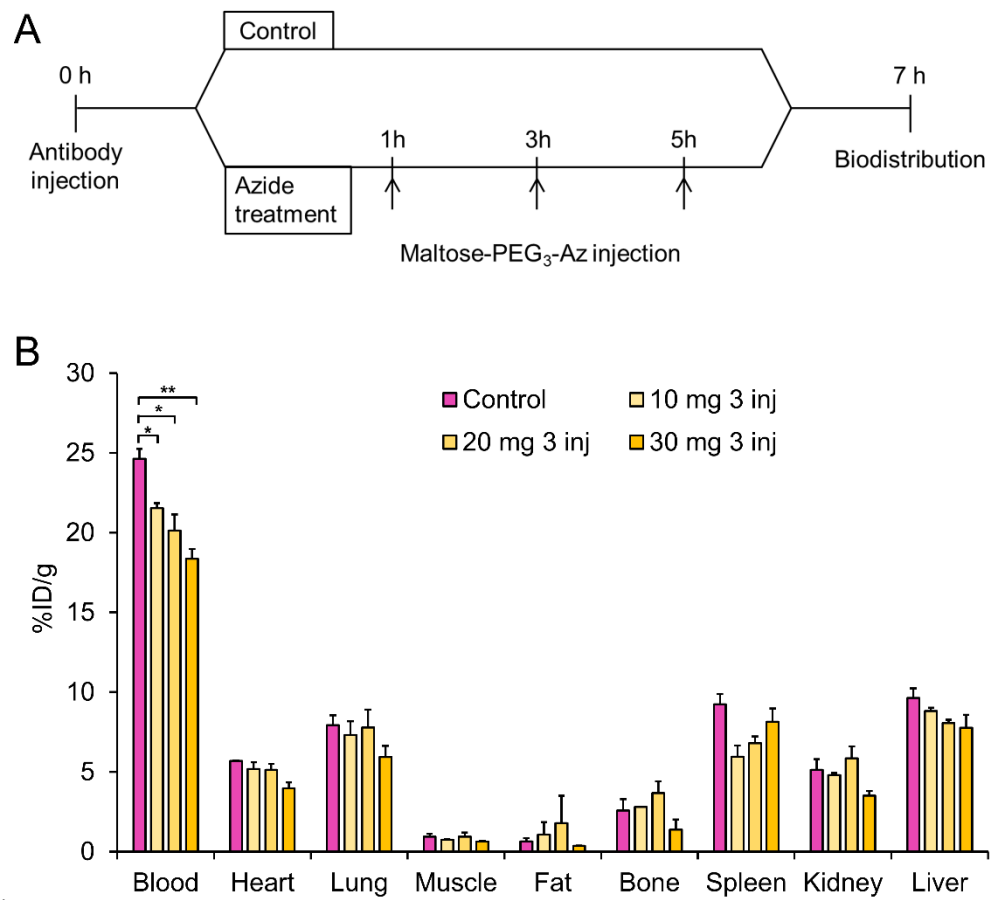

**Figure S26.** Schematic representation demonstrating study plan (A). Biodistribution data of ICR mice after injection of [<sup>131</sup>I]DPTA-trastuzumab followed by varying the quantity of maltose-PEG<sub>3</sub>-azide (B) (n = 2). \**p* < 0.05 and \*\**p* < 0.001.

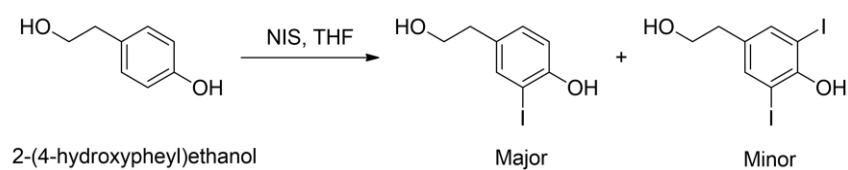

**Figure S27.** Synthetic scheme of non-radioactive 4-(2-hydroxyethyl)-2-iodophenol.

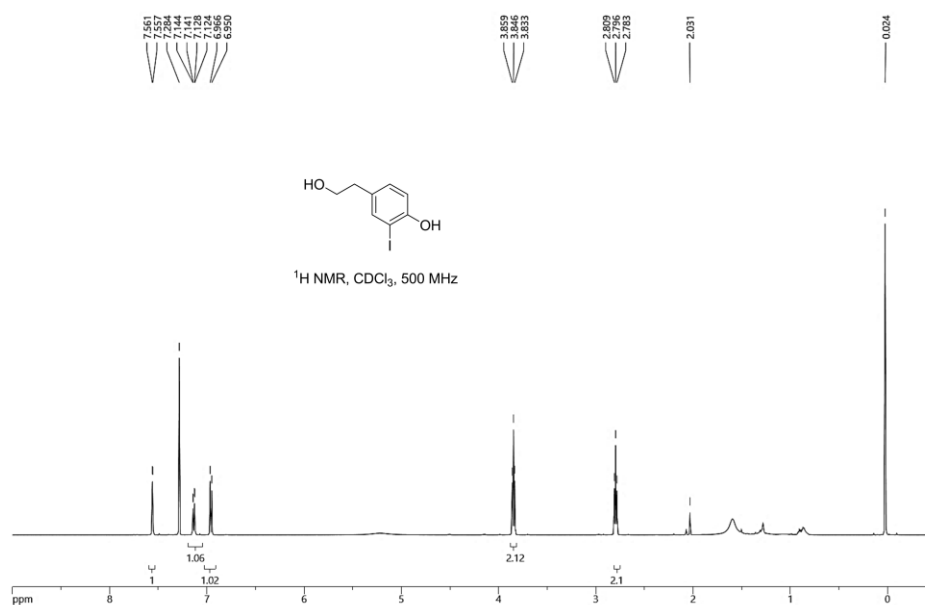

**Figure S28.** <sup>1</sup>H NMR spectrum of 4-(2-hydroxyethyl)-2-iodophenol.

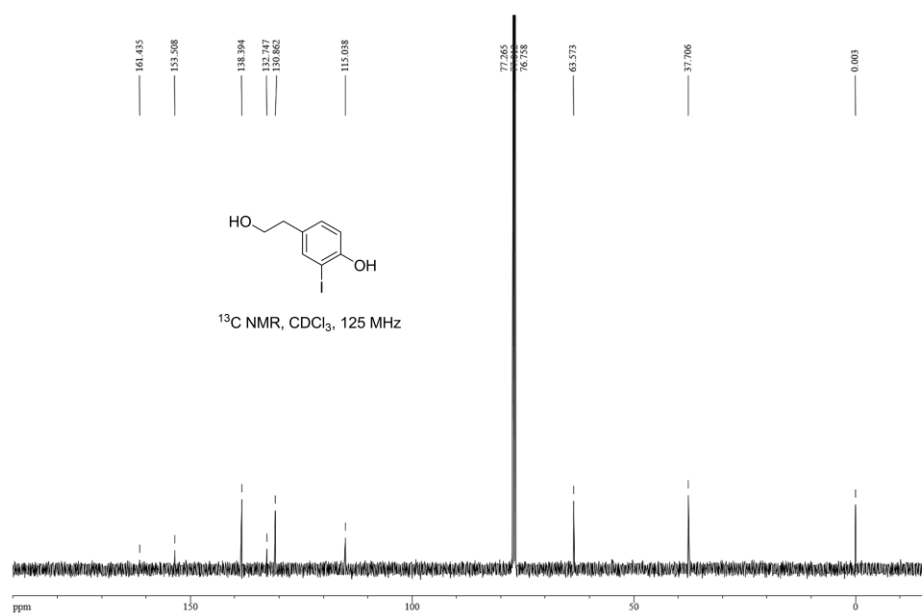

Figure S29.  $^{13}\text{C}$  NMR spectrum of 4-(2-hydroxyethyl)-2-iodophenol.

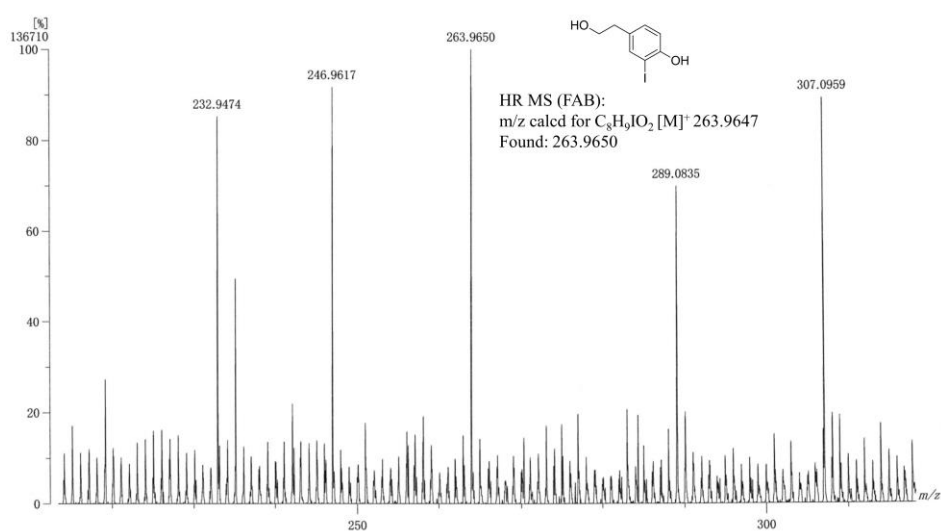

Figure S30. High resolution mass spectroscopic data for 4-(2-hydroxyethyl)-2-iodophenol.

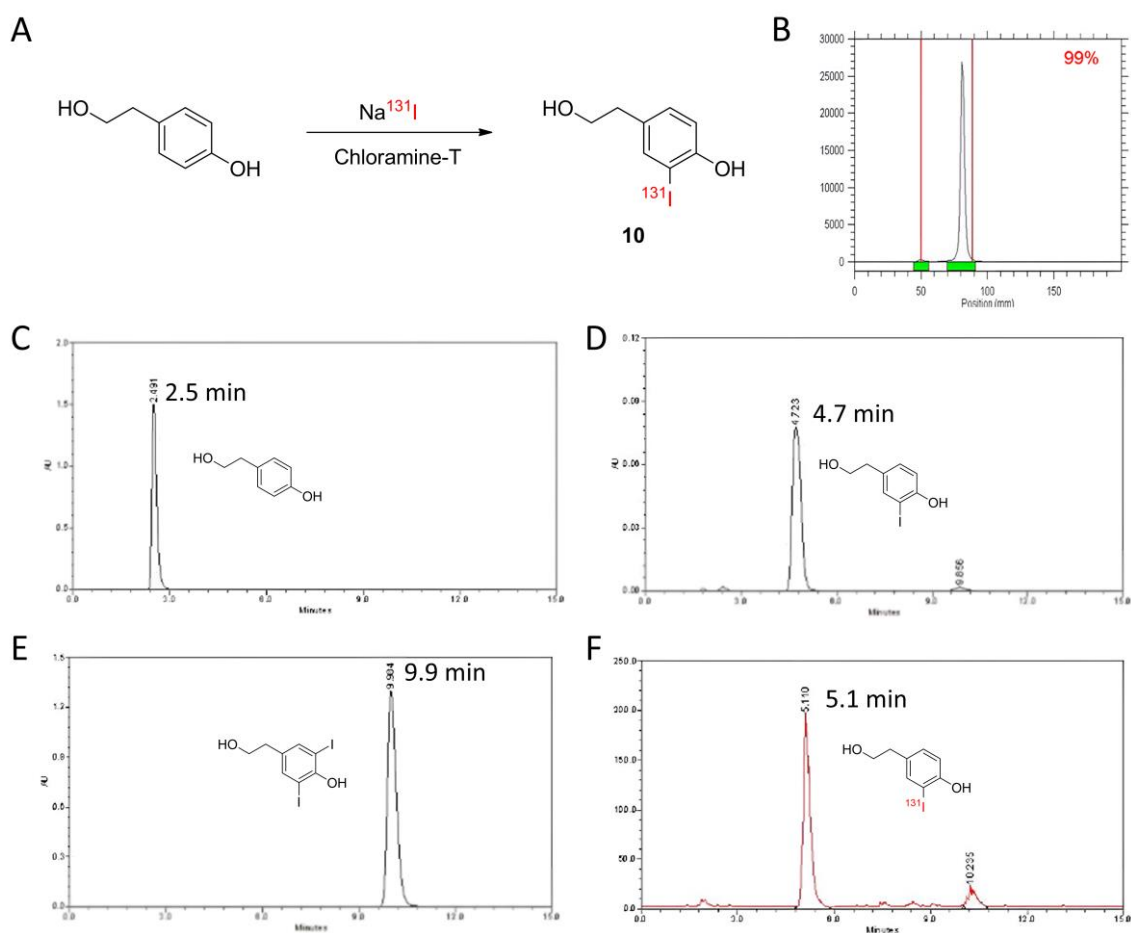

**Figure S31.** Schematic of radiolabeling of 4-(2-hydroxyethyl)-2-[ $^{131}\text{I}$ ]iodophenol (**10**) (A). Radio thin-layer chromatogram of compound **10** performed in silica, ethyl acetate:methanol (95:5) (B). UV-HPLC chromatograms of 2-(4-hydroxyphenyl) ethanol (C), 4-(2-hydroxyethyl)-2-iodophenol (D), 4-(2-hydroxyethyl)-2,6-diiodophenol (E) and radio-HPLC chromatogram of 4-(2-hydroxyethyl)-2-[ $^{131}\text{I}$ ]iodophenol (**10**) (F).

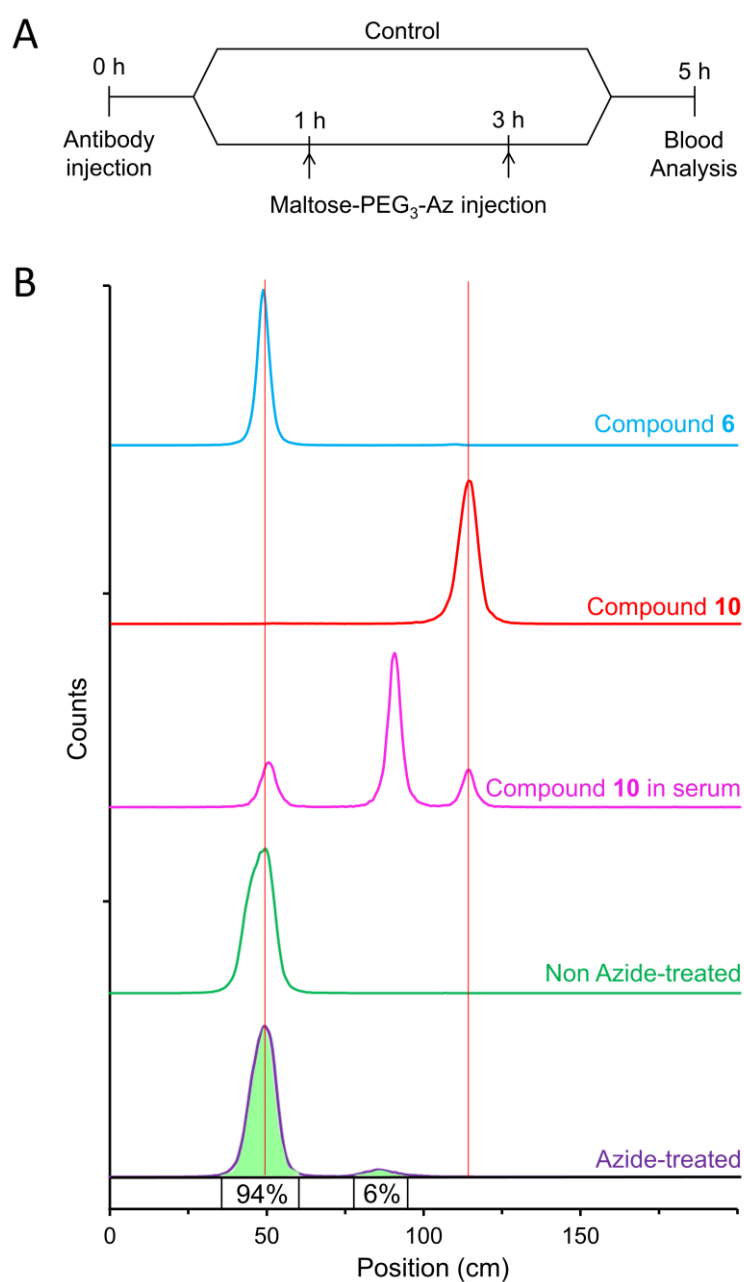

**Figure S32.** Radio-TLC analysis of in vivo Staudinger ligation in serum of control and azide-treated mice. Purified [<sup>131</sup>I]DPTA-trastuzumab (**6**) (blue line), 4-(2-hydroxyethyl)-2-[<sup>131</sup>I]iodophenol (**10**) (red line), non-azide-treated control serum (green line), maltose-PEG<sub>3</sub>-azide treated serum mixed with 4-(2-hydroxyethyl)-2-[<sup>131</sup>I]iodophenol (**10**) (pink line), maltose-PEG<sub>3</sub>-Az treated serum (violet line). All radio-TLC were developed using iTLC and saline.

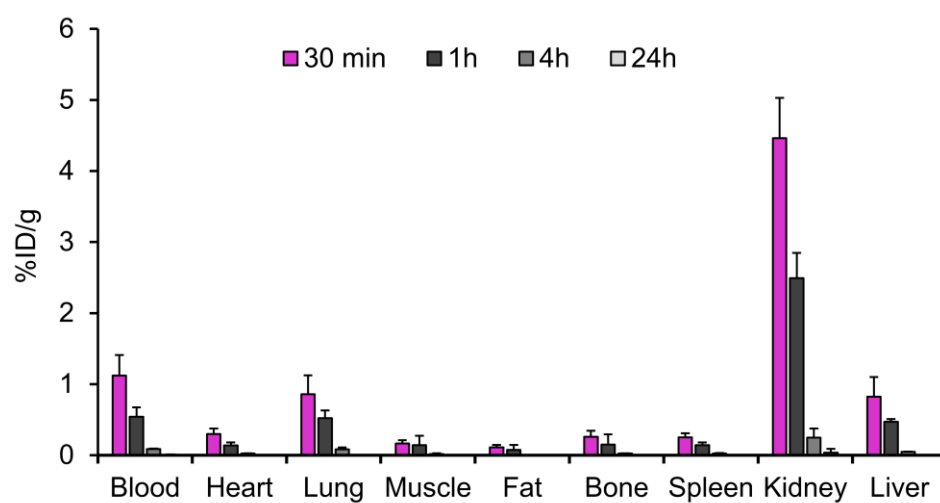

**Figure S33.** Biodistribution of 4-(2-hydroxyethyl)-2-[<sup>131</sup>I]iodophenol (**10**) in normal ICR mice (n = 3).
